# Supplementary material for: Bioactivity of Isostructural Hydrogen Bonding Frameworks Built from Pipemidic Acid Metal Complexes
Source: Molecules. 2020 May 20;25(10):2374. doi: 10.3390/molecules25102374 (PMC7287797; doi:10.3390/molecules25102374)
Supplement: Supplementary file 1 [file molecules-25-02374-s001.pdf]

# SUPPORTING INFORMATION

## BIOACTIVITY OF ISOSTRUCTURAL HYDROGEN BONDING FRAMEWORKS BUILT FROM PIPEMIDIC ACID METAL COMPLEXES

*Paula C. Alves<sup>a,b</sup>, Patrícia Rijo<sup>c,d</sup>, Catarina Bravo<sup>a,b</sup>, Alexandra M. M.  
Antunes<sup>a</sup>, Vânia André<sup>a,b\*</sup>*

<sup>a</sup> Centro de Química Estrutural, Instituto Superior Técnico, Universidade de Lisboa, Av. Rovisco Pais 1, 1049-001 Lisboa, Portugal; <sup>b</sup> Associação do Instituto Superior Técnico para a Investigação e Desenvolvimento (IST-ID), Av. Rovisco Pais 1, 1049-003 Lisboa, Portugal; <sup>c</sup> Universidade Lusófona's Research Center for Biosciences and Health Technologies (CBIOS), Campo Grande 376, 1749-024 Lisboa, Portugal; <sup>d</sup> Research Institute for Medicines (iMed. ULisboa), Faculty of Pharmacy, Universidade de Lisboa, Av. Prof. Gama Pinto, 1649-003 Lisboa, Portugal.

*\*vaniandre@tecnico.ulisboa.pt*

## STRUCTURAL DATA

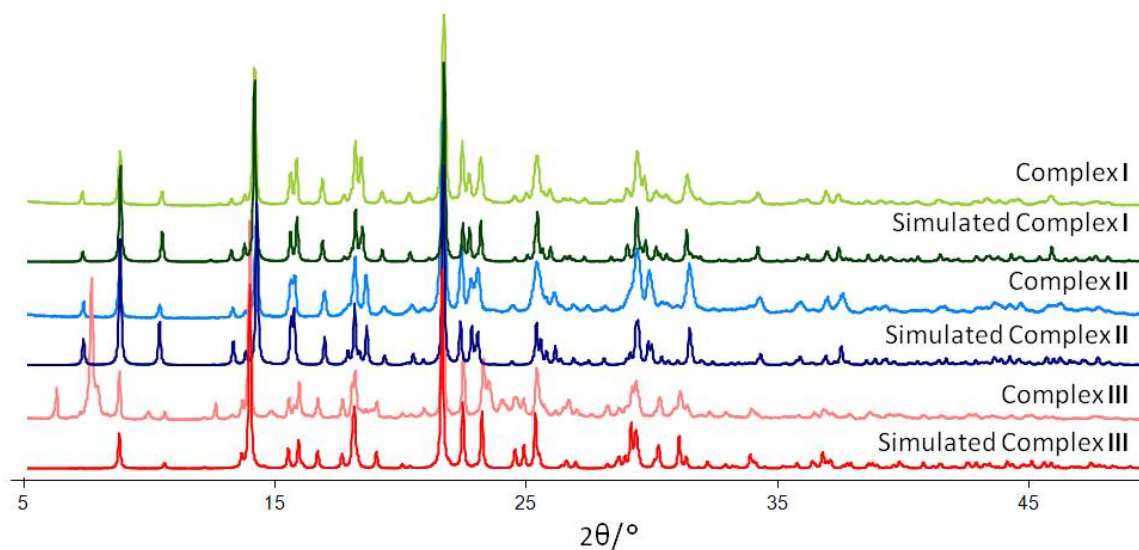

**Figure S1.** Powder X-ray diffractograms of complexes **I**, **II** and **III** recorded after mechanochemistry, at room conditions, and the respective theoretical diffractograms.

**Table S1.** Selected bond distances (Å) and angles (°) for complexes **I-III**.

|                       | <b>I</b> (M=Mn) | <b>II</b> (M=Zn) | <b>III</b> (M=Ca) |
|-----------------------|-----------------|------------------|-------------------|
| M(1) - O(1)           | 2.093(3)        | 2.015(3)         | 2.251(4)          |
| M(1) - O(3)           | 2.181(3)        | 2.109(2)         | 2.322(3)          |
| M(1) - O(1W)          | 2.205(4)        | 2.129(3)         | 2.353(4)          |
| O(1) - M(1) - O(1W)   | 92.82(12)       | 88.06(11)        | 95.40(14)         |
| O(1) - M(1) - O(3)    | 83.02(10)       | 86.96(9)         | 76.67(12)         |
| O(1) - M(1) - O(1)a   | 180.00          | 180.00           | 180.00            |
| O(1) - M(1) - O(1W)a  | 87.18(12)       | 91.94(11)        | 84.60(14)         |
| O(1) - M(1) - O(3)a   | 96.98(10)       | 93.04(9)         | 103.33(12)        |
| O(1W) - M(1) - O(3)   | 88.04(12)       | 92.75(10)        | 89.78(14)         |
| O(1W) - M(1) - O(1W)a | 180.00          | 180.00           | 180.00            |
| O(1W) - M(1) - O(3)a  | 91.96(12)       | 87.25(10)        | 90.22(14)         |
| O(3) - M(1) - O(3)a   | 180.00          | 180.00           | 180.00            |

## HIRSHFELD SURFACE AND 2D FINGERPRINT PLOTS

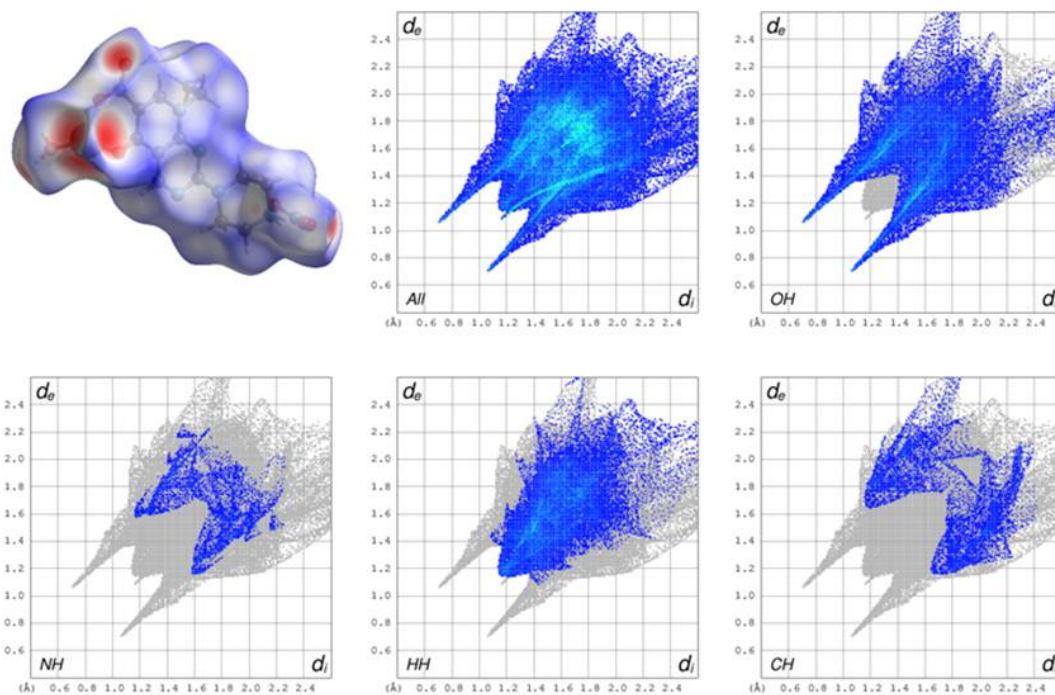

Figure S2. Hirshfeld surface and 2D fingerprint plots for complex I, similar to complexes II and III.

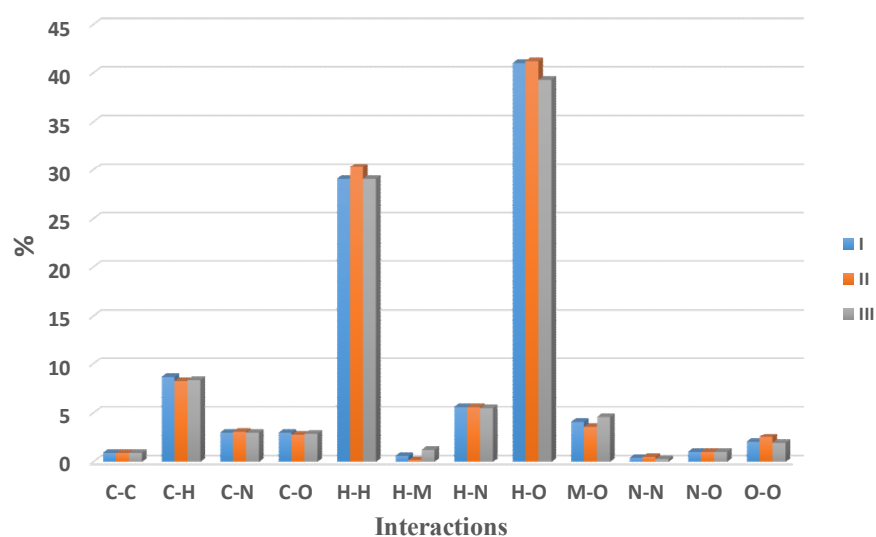

Figure S3. Summary of the percentage (%) of the interactions taken from the 2D fingerprint plots.

## INFRARED SPECTROSCOPY DATA

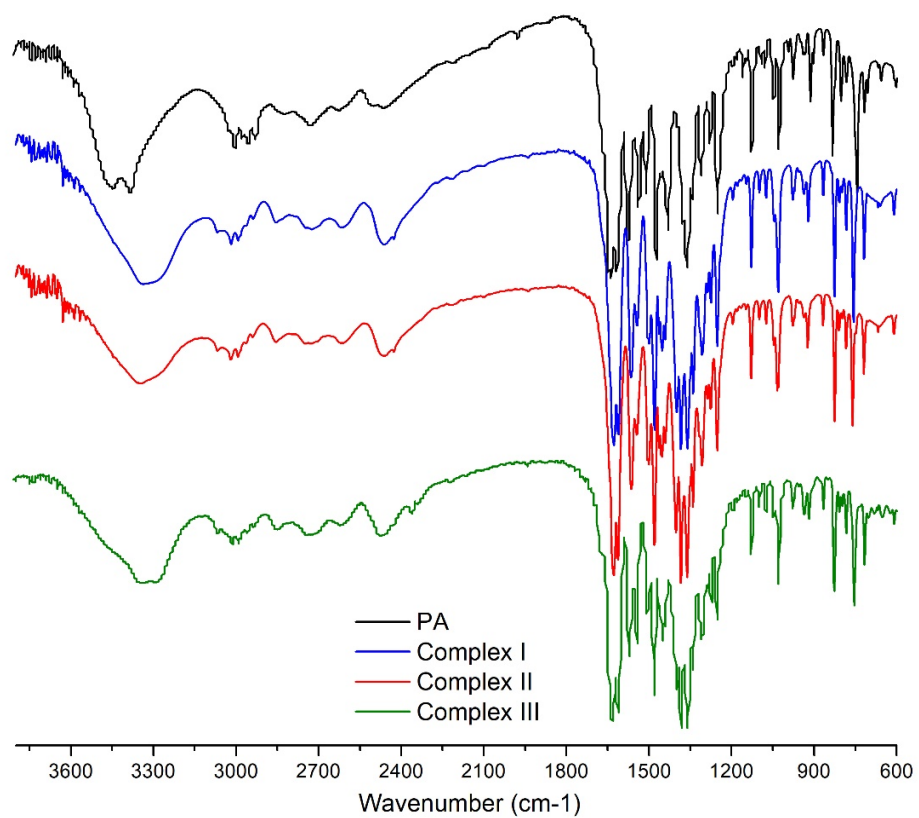

**Figure S4.** Fourier-transform infrared (FTIR) spectra of pipemidic acid (PA) and complexes **I-III** in KBr pellets.

## SHELF STABILITY

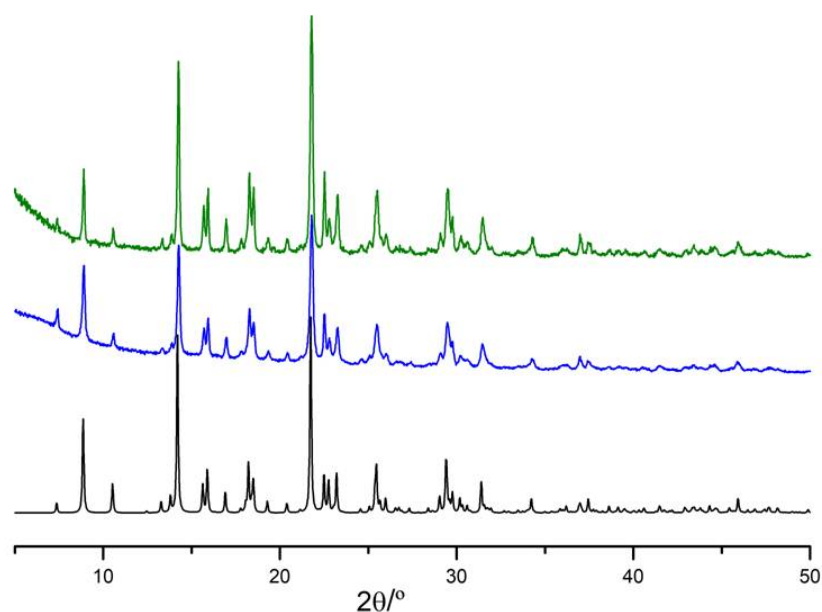

**Figure S5.** Powder X-ray diffractograms of complex **I** recorded after mechanochemistry (blue) and after 5 months on the shelf (green), at room conditions, compared to the respective simulated diffractogram from the solved crystal structure (black).

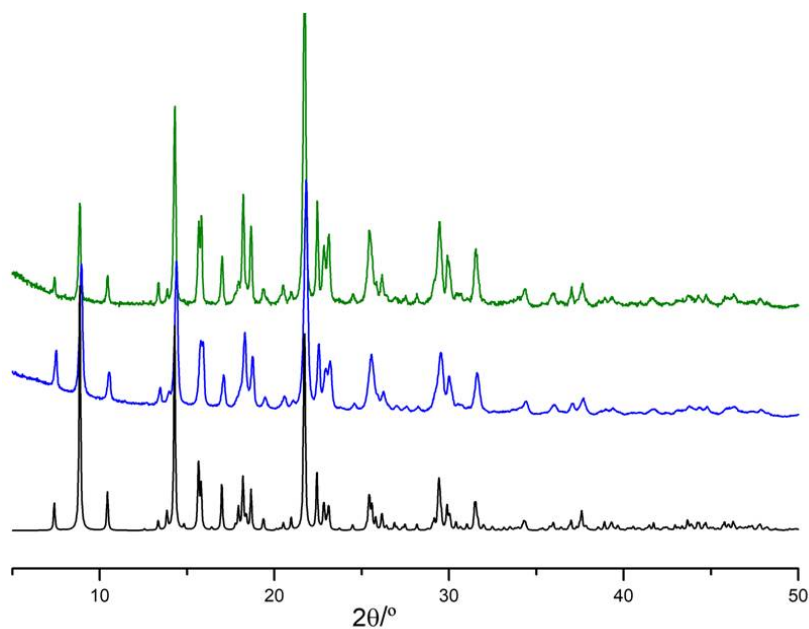

**Figure S6.** Powder X-ray diffractograms of complex **II** recorded after mechanochemistry (blue) and after 5 months on the shelf (green), at room conditions, compared to the respective simulated diffractogram from the solved crystal structure (black).

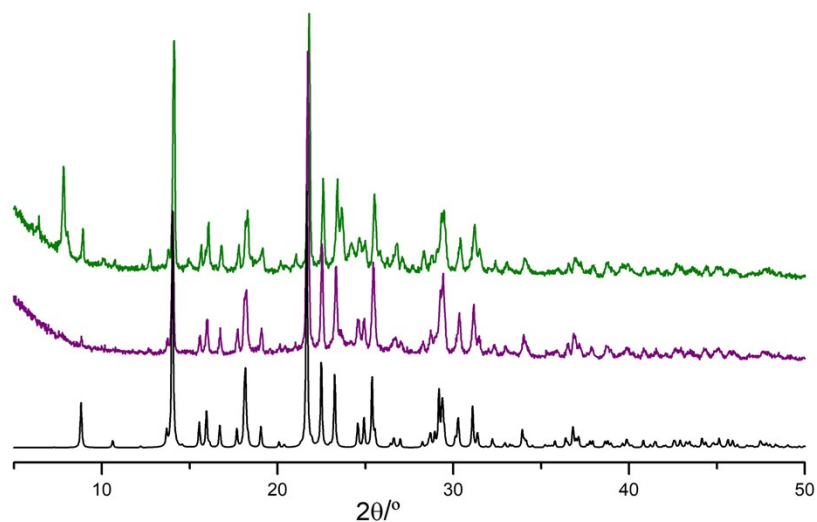

**Figure S7.** Powder X-ray diffractograms of complex **III** recorded after mechanochemistry (purple) and after 5 months on the shelf (green), at room conditions, compared to the respective simulated diffractogram from the solved crystal structure (black).

## THERMAL STABILITY:

### 1) DSC/TGA DATA

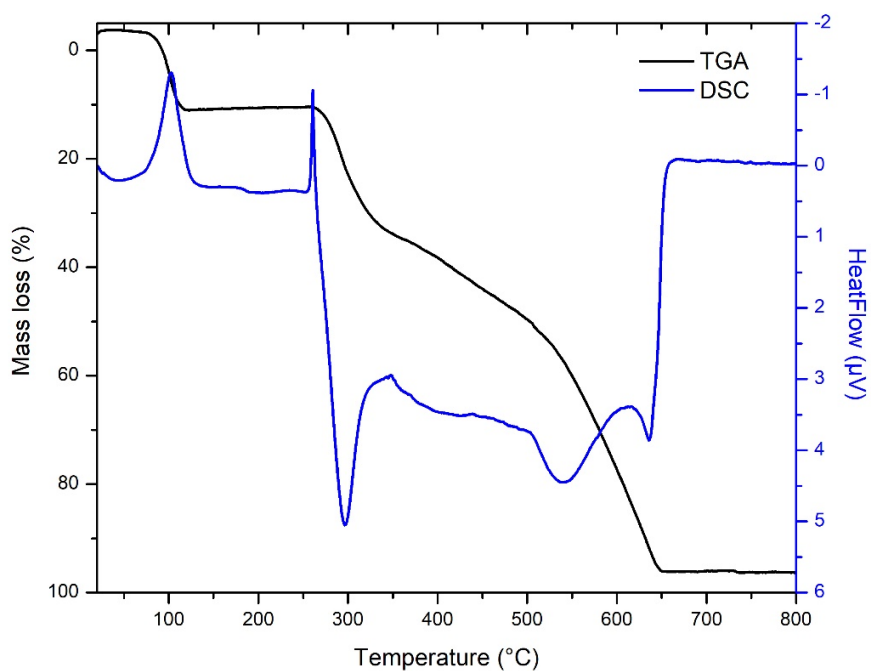

**Figure S8.** Thermogravimetry (TGA, black) and differential scanning calorimetry (DSC, blue) of pipemidic acid.

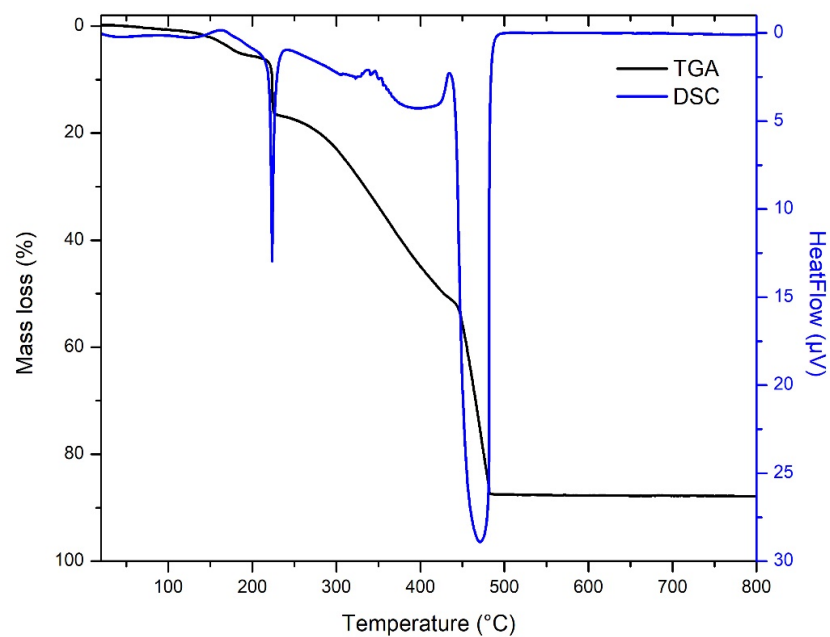

**Figure S9.** Thermogravimetry (TGA, black) and differential scanning calorimetry (DSC, blue) of complex I.

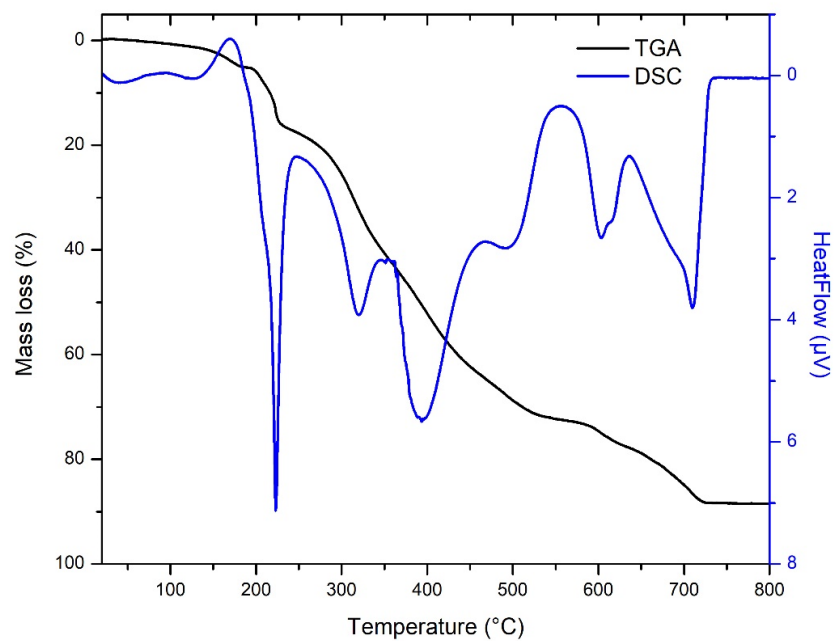

**Figure S10.** Thermogravimetry (TGA, black) and differential scanning calorimetry (DSC, blue) of complex II.

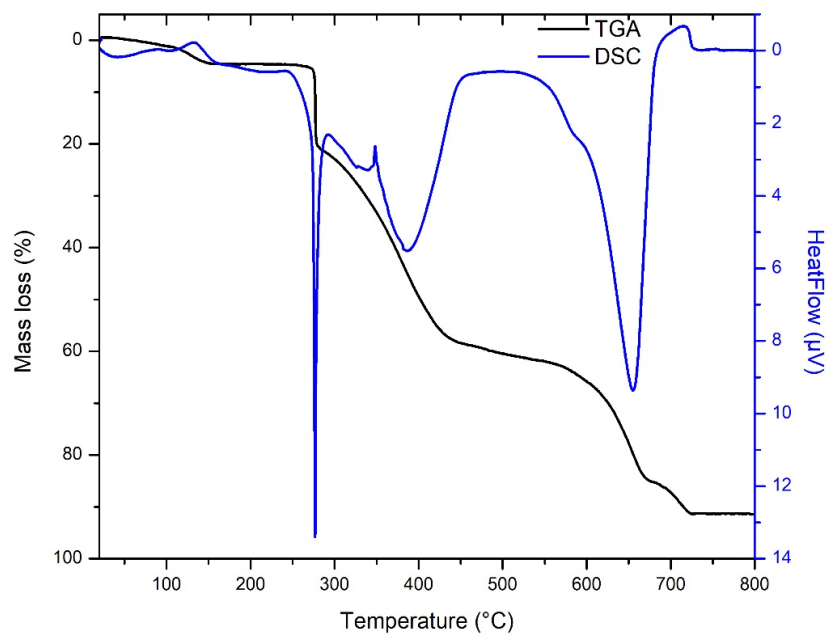

**Figure S11.** Thermogravimetry (TGA, black) and differential scanning calorimetry (DSC, blue) of complex **III**.

## 2) HOT-STAGE MICROSCOPY (HSM) DATA

**Table S2.** Images of hot-stage microscopy data for complexes **I**, **II** and **III**.

| Complex I                                                                           | Complex II                                                                          | Complex III                                                                          |
|-------------------------------------------------------------------------------------|-------------------------------------------------------------------------------------|--------------------------------------------------------------------------------------|
| 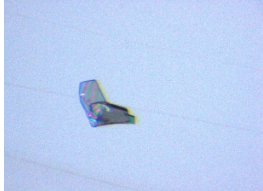 | 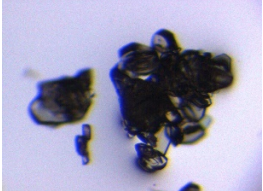 | 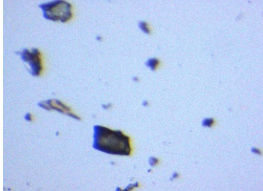 |
| T=32°C                                                                              | T=32°C                                                                              | T=32°C                                                                               |
| 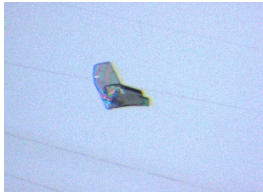 | 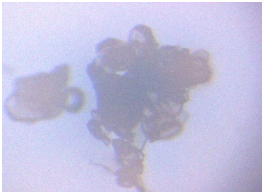 | 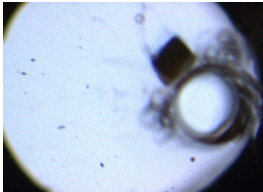 |
| T=120°C                                                                             | T=126°C                                                                             | T=128°C                                                                              |
| 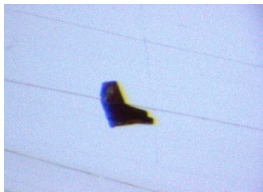 | 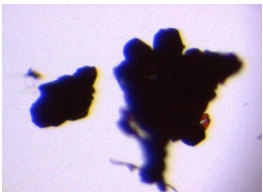 | 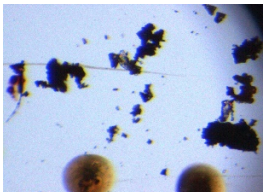 |
| T=260°C                                                                             | T=292°C                                                                             | T=265°C                                                                              |

### 3) VARIABLE TEMPERATURE POWDER X-RAY DIFFRACTION (VT-PXRD) DATA

**Table S3.** Temperature variation of crystallinity of complexes I, II and III.

| Compound          |      | Complex I   |      |      |      |  |
|-------------------|------|-------------|------|------|------|--|
| Temperature (°C)  | 30   | 60          | 120  | 200  | 30   |  |
| Crystallinity (%) | 93.5 | 92.2        | 89.6 | 61.5 | 58.2 |  |
| Compound          |      | Complex II  |      |      |      |  |
| Temperature (°C)  | 30   | 50          | 120  | 190  | 30   |  |
| Crystallinity (%) | 95.5 | 95.9        | 93.1 | 83.6 | 93.2 |  |
| Compound          |      | Complex III |      |      |      |  |
| Temperature (°C)  | 30   | 50          | 80   | 160  | 30   |  |
| Crystallinity (%) | 94.4 | 93.8        | 94.3 | 80.0 | 93.2 |  |

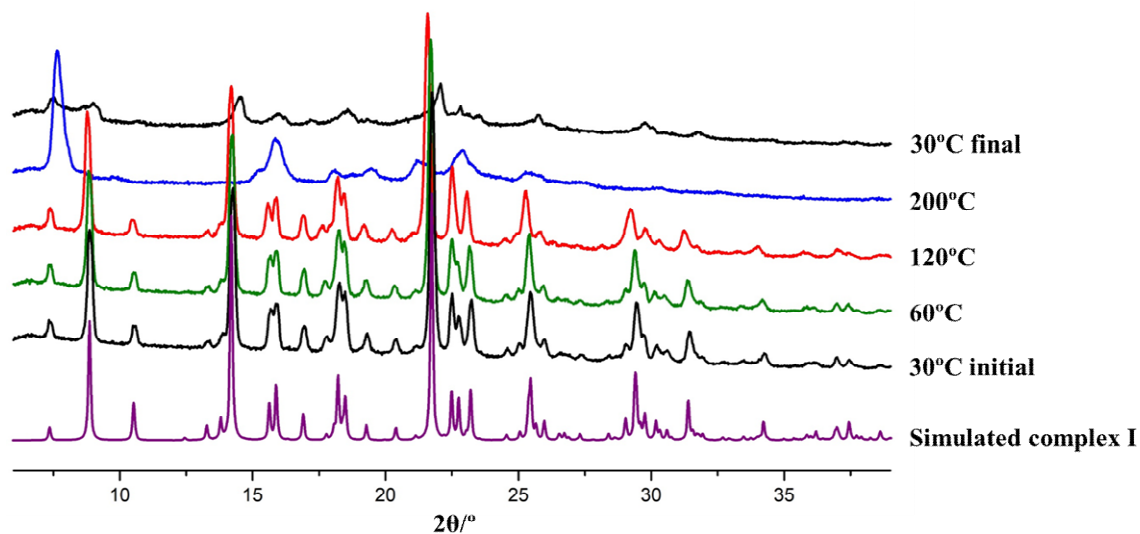

**Figure S12.** Variable temperature powder X-ray diffraction of complex I recorded at five different temperatures and displaying different crystallinity patterns.

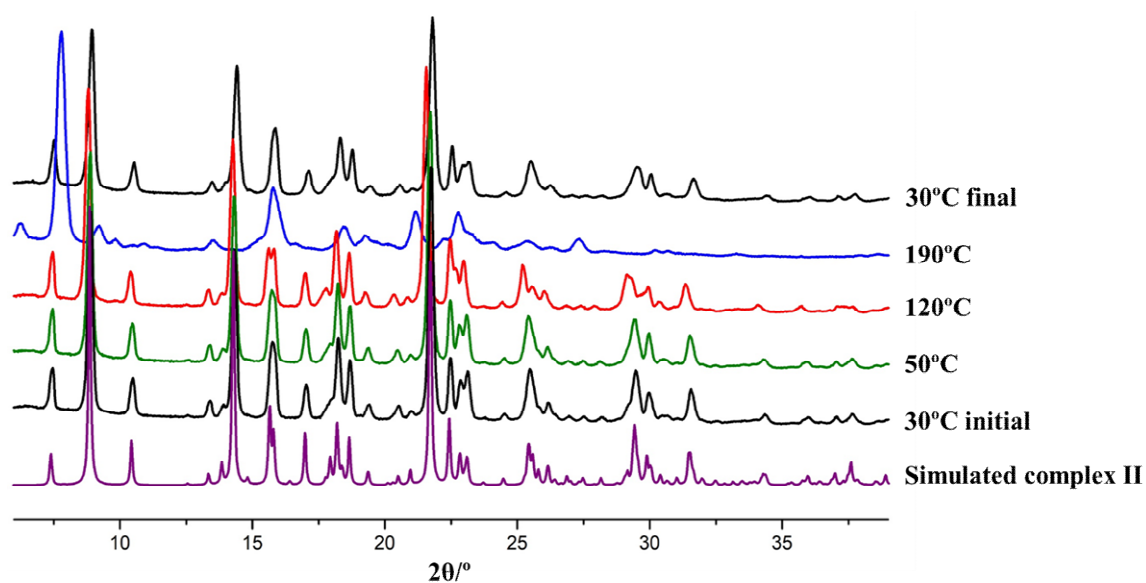

**Figure S13.** Variable temperature powder X-ray diffraction of complex **II** recorded at five different temperatures and displaying different crystallinity patterns.

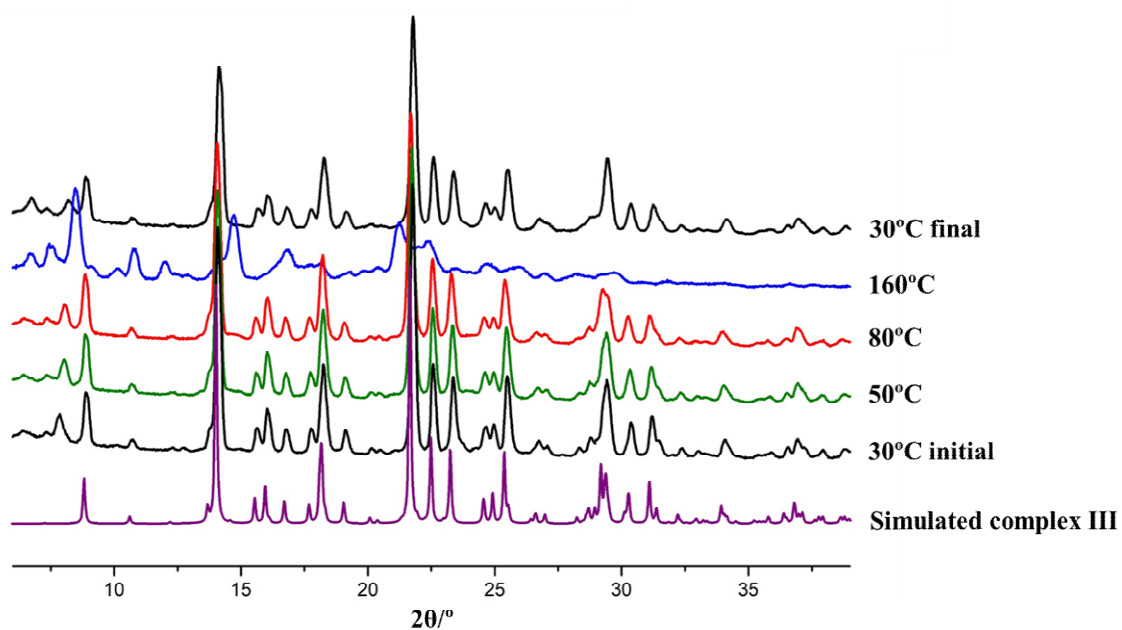

**Figure S14.** Variable temperature powder X-ray diffraction of complex **III** recorded at five different temperatures and displaying different crystallinity patterns.

## NMR SPECTROSCOPY EXPERIMENTS

NMR spectroscopy experiments were performed to verify if the coordination of pipemidic acid on the complexes is maintained in aqueous solution.  $^1\text{H}$  NMR spectra were obtained for complexes **II** and **III** and for free pipemidic acid in  $\text{D}_2\text{O}$  (**Figure S15**). The coordination can be confirmed by observable  $^1\text{H}$  signal shifts of the coordinated pipemidic acid on the complexes compared to the spectra of the free antibiotic.

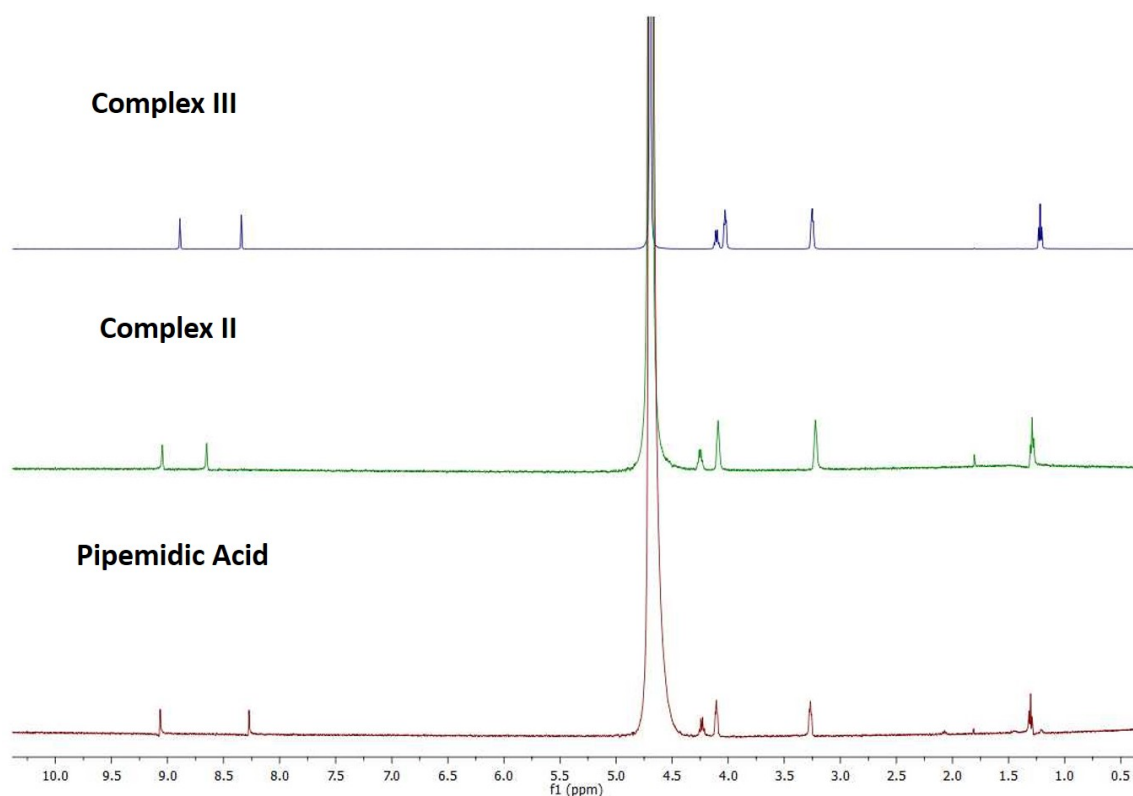

**Figure S15.**  $^1\text{H}$  NMR spectra of the uncoordinated pipemidic acid, complexes **II** and **III** in  $\text{D}_2\text{O}$ .
